# Supplementary material for: Alternations of gut microbiota composition in neonates conceived by assisted reproductive technology and its relation to infant growth
Source: PubMed Central journal article supplement (PMC7524295; doi:10.1080/19490976.2020.1794466), 2020-08-04
Supplement: KGMI_A_1794466_SM4843.pdf [file KGMI_A_1794466_SM4843.pdf]

**Supporting information**

**Alternations of gut microbiota composition in neonates conceived by assisted reproductive  
technology and its relation to infant growth**

Qun Lu, Yuan Lin, Ting Chen, Hong Lv, Feiyang Diao, Cong Liu, Meijuan Peng, Xiufeng Ling, Hong

Li, Yun Wang, Yongyue Wei, Jiangbo Du, Guangfu Jin, Yankai Xia, Hongxia Ma, Xingyin Liu,

Hongbing Shen, Zhibin Hu

Supplementary Fig. 1. The first meconium microbiome exhibit discrete composition between ART- and spontaneous-conceived neonates.

- A. Co-occurrence network analysis in ART conception group. Each node represents a genus, nodes of the same color belong to the same phylum, the significantly correlated genera (FDR < 0.05) were visualized. The node size represents the relative abundance of the genus, the red line represents the positive correlation of the genus, the green line represents the negative correlation of the genus, and the line thickness represents the correlation strength.
- B. Co-occurrence network analysis in spontaneous conception group.
- C. Comparison between two groups' gut microbiota ecology. Heatmap plot of centrality of nodes (genera), and Venn Diagram shows the number of connections in the two microbial networks.
- D. Log (relative abundance of Firmicutes/relative abundance of Bacteroidetes) between ART and spontaneous conception groups (and between ART caesarean section and spontaneous caesarean section groups; C/S, caesarean section). Boxes indicate interquartile range, lines indicate medians, and whiskers represent range.
- E. Intra-individual  $\beta$ -diversity (Bray-Curtis dissimilarity) between microbiomes in the first-pass meconium and those in the later fecal samples in ART and spontaneous conception groups. Boxes indicate interquartile range, lines indicate medians, and whiskers represent range.



Supplementary Fig. 2. Regimen of ovulation was in relation to gut Bacteroidetes relative abundance in the neonates conceived by ART.

- A. Comparison of  $\beta$  diversity between agonist long regimen and antagonist regimen groups using PERMANOVA.
- B. Co-occurrence network analysis in agonist long regimen group.
- C. Co-occurrence network analysis in antagonist regimen group.
- D. Comparison between two groups' gut microbiota ecology. Heatmap plot of centrality of nodes (genera), and Venn Diagram shows the number of connections in the two microbial networks.
- E. **Linear** discriminant analysis of taxa enrichment between agonist long regimen and antagonist regimen groups. Criteria: Alpha value for the factorial Kruskal-Wallis test among classes  $< 0.05$ ; Alpha value for the pairwise Wilcoxon test between subclasses  $< 0.05$ ; LDA score for discriminative features  $> 4$ .
- F. Comparison of  $\alpha$ -diversity of Bacteroidetes (Simpson, Shannon **index** and **Observed OTU numbers** of Bacteroidetes) between agonist long regimen and antagonist regimen groups.

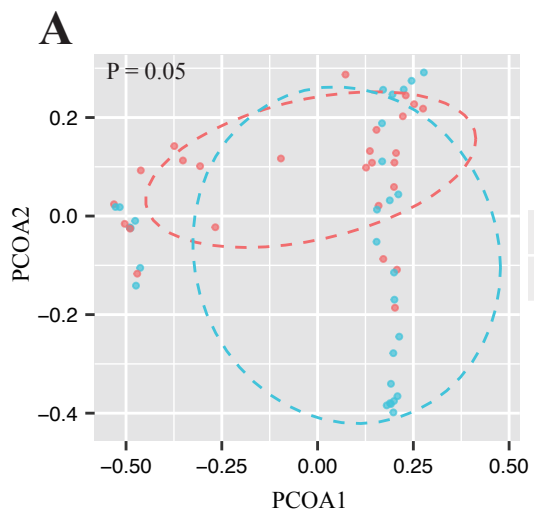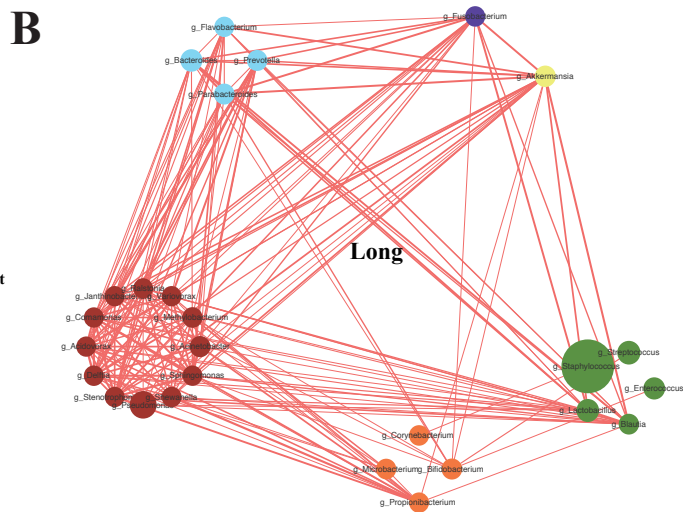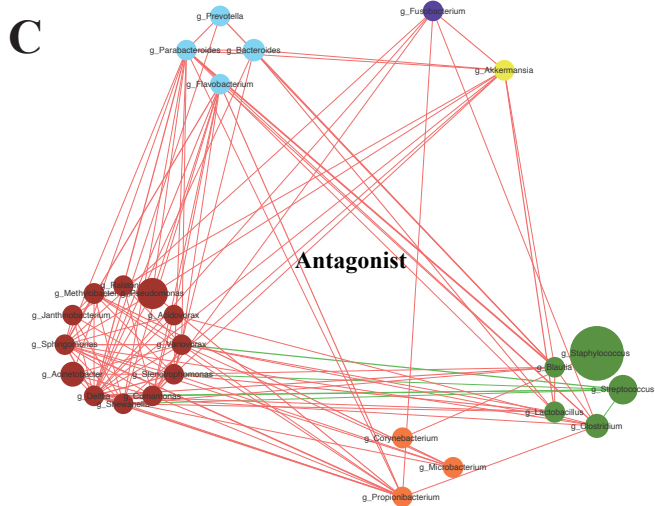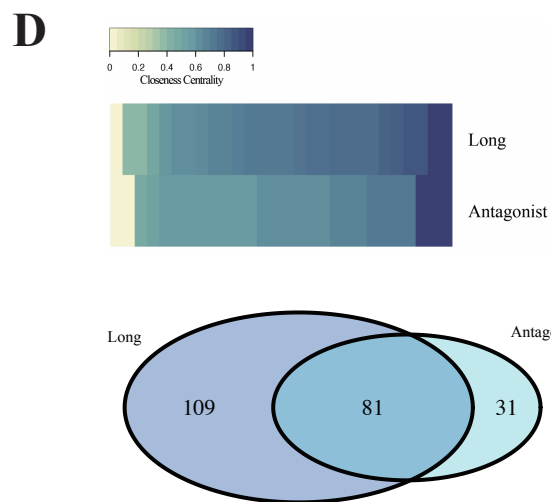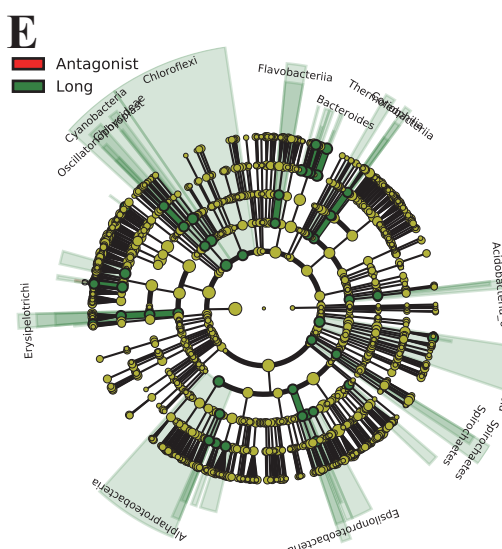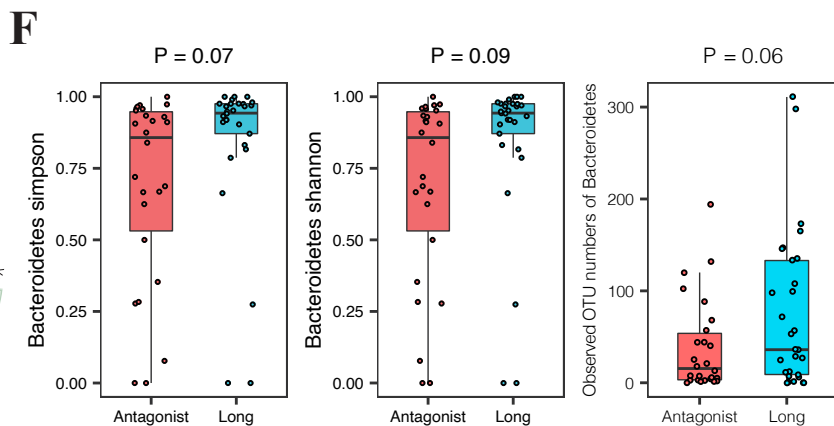

Supplementary Fig. 3. Type of embryo was in relation to the relative abundance of gut Bacteroidetes in the neonates conceived by ART.

- A. Comparison of  $\beta$  diversity between frozen embryo transfer and fresh embryo transfer groups using PERMANOVA.
- B. Co-occurrence network analysis in frozen embryo transfer group.
- C. Co-occurrence network analysis in fresh embryo transfer group.
- D. Comparison between two groups' gut microbiota ecology. Heatmap plot of centrality of nodes (genera), and Venn Diagram shows the number of connections in the two microbial networks.
- E. **Linear** discriminant analysis of taxa enrichment between frozen embryo transfer and fresh embryo transfer groups. Criteria: Alpha value for the factorial Kruskal-Wallis test among classes  $< 0.05$ ; Alpha value for the pairwise Wilcoxon test between subclasses  $< 0.05$ ; LDA score for discriminative features  $> 4$ .
- F. Comparison of  $\alpha$ -diversity of Bacteroidetes (Simpson, Shannon **index** and **Observed OTU numbers** of Bacteroidetes) between frozen embryo transfer and fresh embryo transfer groups.

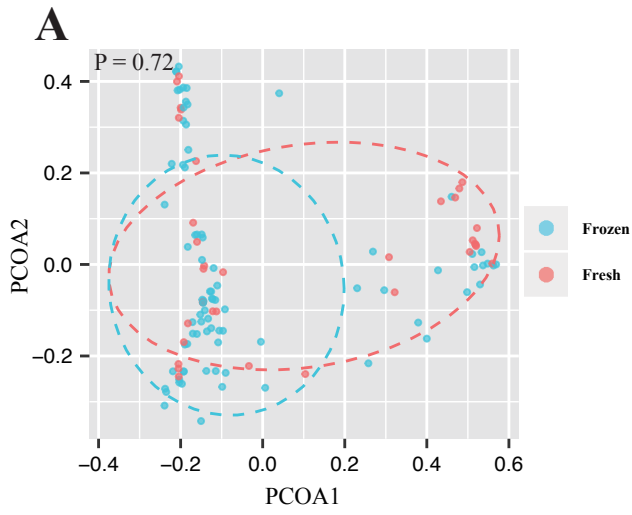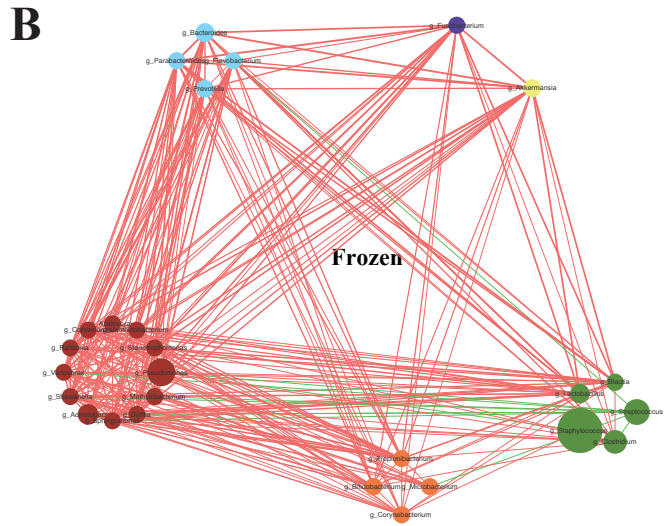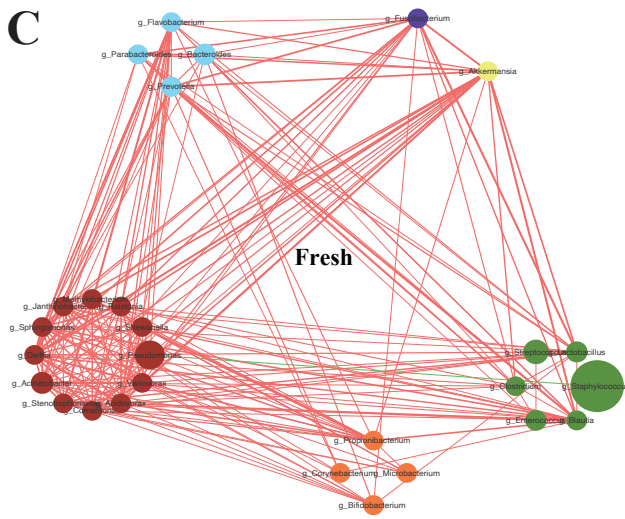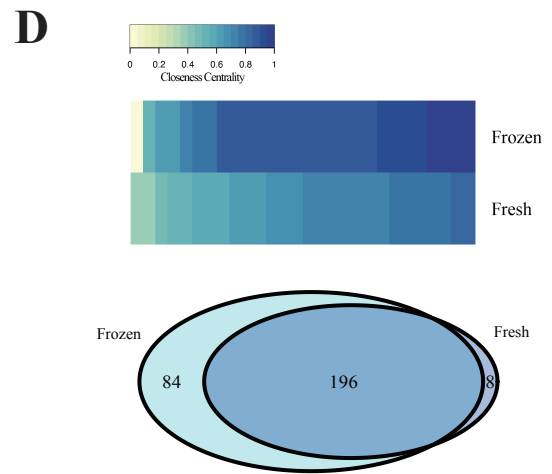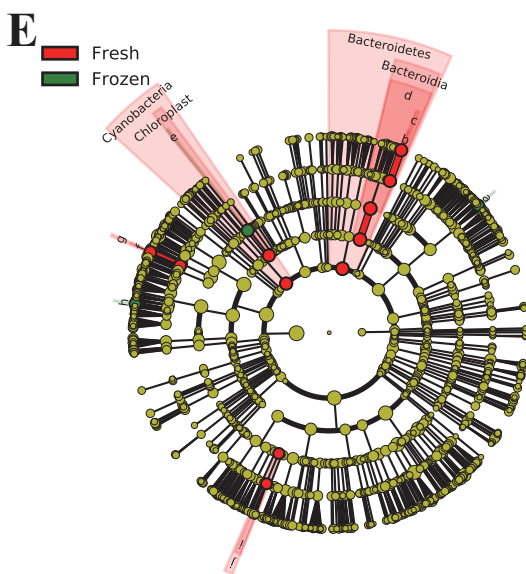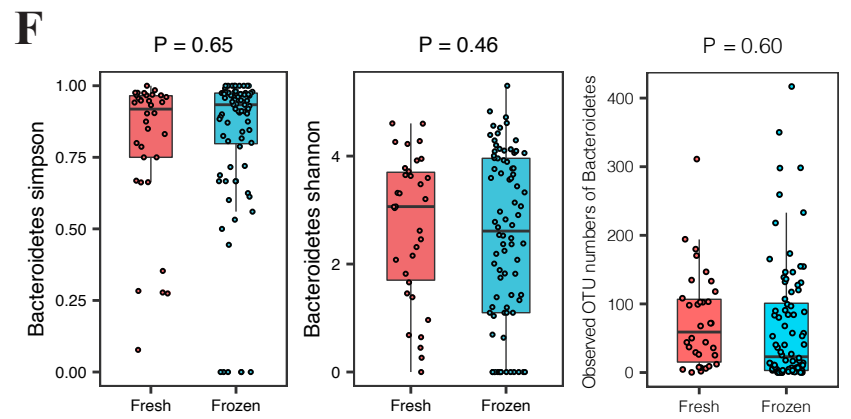

Supplementary Fig. 4. Estradiol level was in relation to the relative abundance of gut Bacteroidetes in the neonates conceived by ART.

- A. Comparison of  $\beta$  diversity between high HCG day estradiol level and low HCG day estradiol level groups using PERMANOVA.
- B. Co-occurrence network analysis in high HCG day estradiol level group.
- C. Co-occurrence network analysis in low HCG day estradiol level group.
- D. Comparison between two groups' gut microbiota ecology. Heatmap plot of centrality of nodes (genera), and Venn Diagram shows the number of connections in the two microbial networks.
- E. **Linear** discriminant analysis of taxa enrichment between high HCG day estradiol level and low HCG day estradiol level groups. Criteria: Alpha value for the factorial Kruskal-Wallis test among classes  $< 0.05$ ; Alpha value for the pairwise Wilcoxon test between subclasses  $< 0.05$ ; LDA score for discriminative features  $> 4$ .
- F. Comparison of  $\alpha$ -diversity of Bacteroidetes (Simpson, Shannon **index** and **Observed OTU numbers** of Bacteroidetes) between high HCG day estradiol level and low HCG day estradiol level groups.





Supplementary Fig. 5. Principal Coordinate Analysis (PCoA) for **microbiota in the samples collected from different body sites of pregnant women from the study by Wang et al. and in the meconium samples from the neonates born via ART and following spontaneous conception in our cohort.**

- A. PCoA of the Bray-Curtis distances of oral, intestinal and vaginal microbiota from the pregnant women, and meconium microbiota from the neonates born via ART.
- B. PCoA of the Bray-Curtis distances of oral, intestinal and vaginal microbiota from the pregnant women, and meconium microbiota from the neonates born following spontaneous conception.
- C. **PCoA of the Bray-Curtis distances of oral, intestinal and vaginal microbiota from the pregnant women without GDM, and meconium microbiota from the neonates born via ART.**
- D. **PCoA of the Bray-Curtis distances of oral, intestinal and vaginal microbiota from the pregnant women without GDM, and meconium microbiota from the neonates born following spontaneous conception.**

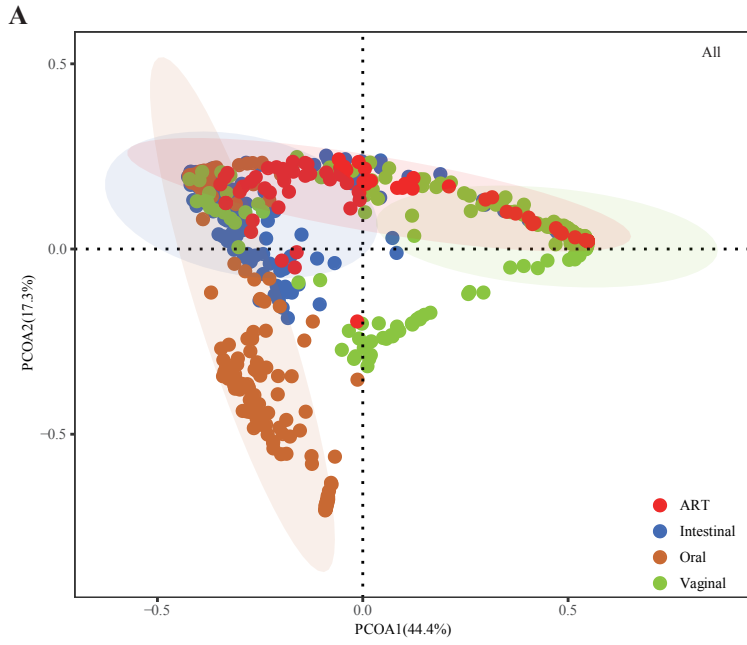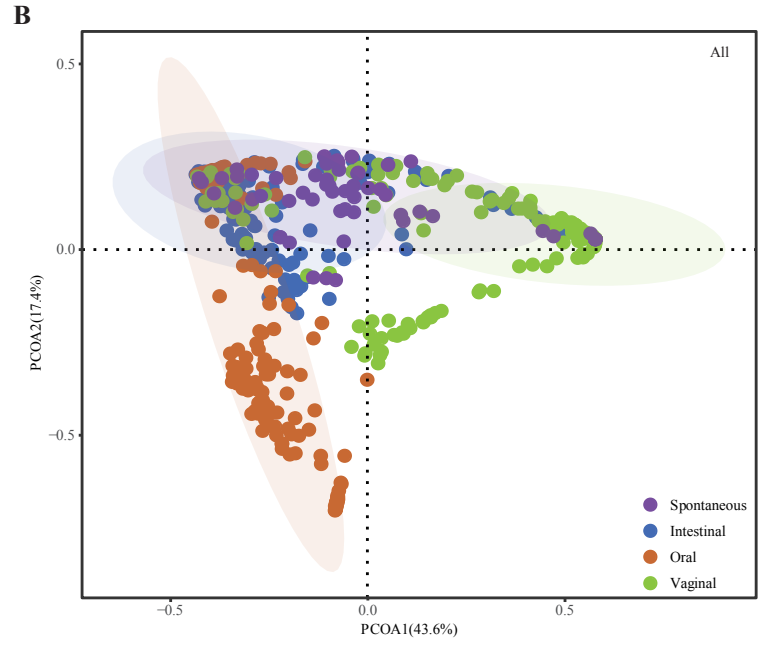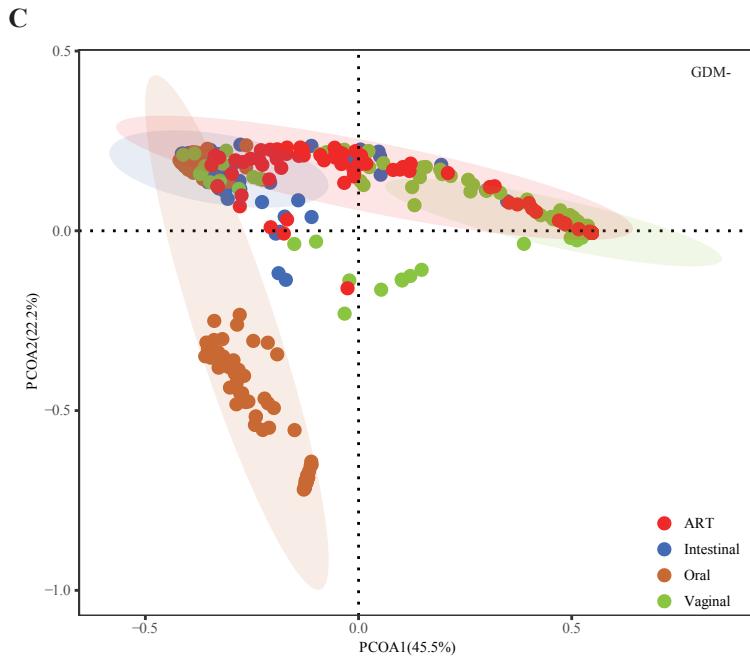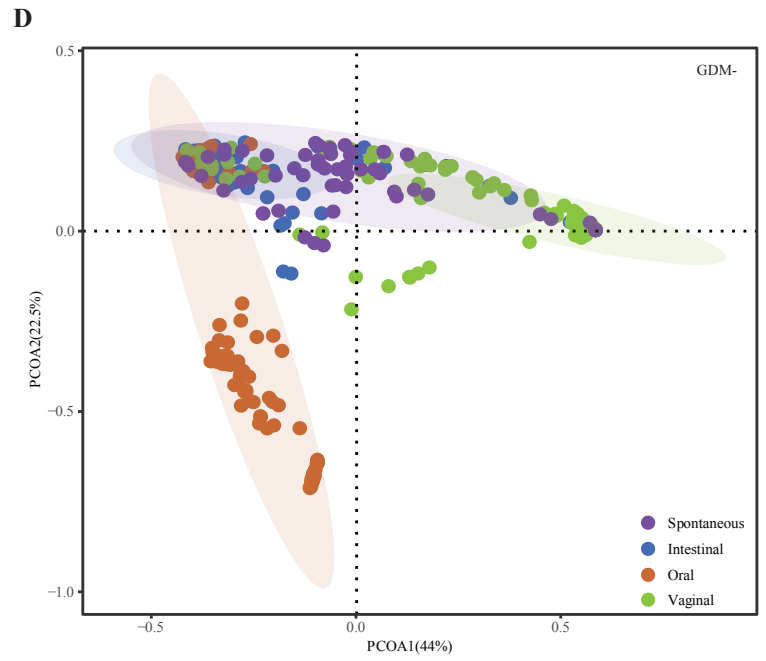

Supplementary Table 1. Differentially abundant core bacterial phyla and genera (mean relative abundance >1%) in the first-pass meconium samples from neonates conceived by ART and after spontaneous conception

| <b>Metadata</b>         | <b>Genus</b>   | <b>Value</b> | <b>Coefficient</b> | <b>P-value</b>         | <b>Q-value</b>         |
|-------------------------|----------------|--------------|--------------------|------------------------|------------------------|
| Conception group        | Acinetobacter  | Spontaneous  | -0.0033            | 8.68×10 <sup>-01</sup> | 9.41×10 <sup>-01</sup> |
| Conception group        | Bacteroides    | Spontaneous  | 0.1351             | 1.28×10 <sup>-05</sup> | 8.19×10 <sup>-04</sup> |
| Conception group        | Clostridium    | Spontaneous  | -0.0155            | 4.54×10 <sup>-01</sup> | 7.37×10 <sup>-01</sup> |
| Conception group        | Enterococcus   | Spontaneous  | -0.0120            | 4.76×10 <sup>-01</sup> | 7.42×10 <sup>-01</sup> |
| Conception group        | Lactobacillus  | Spontaneous  | 0.0377             | 9.97×10 <sup>-02</sup> | 5.76×10 <sup>-01</sup> |
| Conception group        | Pseudomonas    | Spontaneous  | -0.0009            | 9.80×10 <sup>-01</sup> | 9.81×10 <sup>-01</sup> |
| Conception group        | Staphylococcus | Spontaneous  | -0.1188            | 1.05×10 <sup>-02</sup> | 1.34×10 <sup>-01</sup> |
| Conception group        | Streptococcus  | Spontaneous  | -0.0455            | 1.96×10 <sup>-01</sup> | 6.94×10 <sup>-01</sup> |
| Maternal age (years)    | Acinetobacter  | /            | 0.0023             | 7.90×10 <sup>-01</sup> | 9.21×10 <sup>-01</sup> |
| Maternal age (years)    | Bacteroides    | /            | 0.0120             | 3.54×10 <sup>-01</sup> | 7.26×10 <sup>-01</sup> |
| Maternal age (years)    | Clostridium    | /            | -0.0061            | 4.88×10 <sup>-01</sup> | 7.42×10 <sup>-01</sup> |
| Maternal age (years)    | Enterococcus   | /            | -0.0002            | 9.81×10 <sup>-01</sup> | 9.81×10 <sup>-01</sup> |
| Maternal age (years)    | Lactobacillus  | /            | 0.0047             | 6.28×10 <sup>-01</sup> | 8.04×10 <sup>-01</sup> |
| Maternal age (years)    | Pseudomonas    | /            | 0.0011             | 9.46×10 <sup>-01</sup> | 9.81×10 <sup>-01</sup> |
| Maternal age (years)    | Staphylococcus | /            | 0.0203             | 3.02×10 <sup>-01</sup> | 6.99×10 <sup>-01</sup> |
| Maternal age (years)    | Streptococcus  | /            | -0.0285            | 5.76×10 <sup>-02</sup> | 5.13×10 <sup>-01</sup> |
| Infant gender           | Acinetobacter  | Male         | -0.0043            | 7.91×10 <sup>-01</sup> | 9.21×10 <sup>-01</sup> |
| Infant gender           | Bacteroides    | Male         | 0.0347             | 1.66×10 <sup>-01</sup> | 6.24×10 <sup>-01</sup> |
| Infant gender           | Clostridium    | Male         | -0.0242            | 1.58×10 <sup>-01</sup> | 6.24×10 <sup>-01</sup> |
| Infant gender           | Enterococcus   | Male         | 0.0154             | 2.67×10 <sup>-01</sup> | 6.99×10 <sup>-01</sup> |
| Infant gender           | Lactobacillus  | Male         | 0.0193             | 3.08×10 <sup>-01</sup> | 6.99×10 <sup>-01</sup> |
| Infant gender           | Pseudomonas    | Male         | -0.0386            | 2.06×10 <sup>-01</sup> | 6.94×10 <sup>-01</sup> |
| Infant gender           | Staphylococcus | Male         | -0.0045            | 9.05×10 <sup>-01</sup> | 9.65×10 <sup>-01</sup> |
| Infant gender           | Streptococcus  | Male         | 0.0291             | 3.17×10 <sup>-01</sup> | 6.99×10 <sup>-01</sup> |
| Gestational age (weeks) | Acinetobacter  | /            | 0.0083             | 3.63×10 <sup>-01</sup> | 7.26×10 <sup>-01</sup> |

|                                                 |                |         |         |                        |                        |
|-------------------------------------------------|----------------|---------|---------|------------------------|------------------------|
| Gestational age (weeks)                         | Bacteroides    | /       | -0.0250 | $7.21 \times 10^{-02}$ | $5.13 \times 10^{-01}$ |
| Gestational age (weeks)                         | Clostridium    | /       | 0.0114  | $2.27 \times 10^{-01}$ | $6.99 \times 10^{-01}$ |
| Gestational age (weeks)                         | Enterococcus   | /       | -0.0082 | $2.83 \times 10^{-01}$ | $6.99 \times 10^{-01}$ |
| Gestational age (weeks)                         | Lactobacillus  | /       | 0.0084  | $4.23 \times 10^{-01}$ | $7.37 \times 10^{-01}$ |
| Gestational age (weeks)                         | Pseudomonas    | /       | 0.0061  | $7.15 \times 10^{-01}$ | $8.98 \times 10^{-01}$ |
| Gestational age (weeks)                         | Staphylococcus | /       | 0.0065  | $7.57 \times 10^{-01}$ | $9.21 \times 10^{-01}$ |
| Gestational age (weeks)                         | Streptococcus  | /       | -0.0044 | $7.84 \times 10^{-01}$ | $9.21 \times 10^{-01}$ |
| Gravidity                                       | Acinetobacter  | > 0     | 0.0112  | $5.10 \times 10^{-01}$ | $7.42 \times 10^{-01}$ |
| Gravidity                                       | Bacteroides    | > 0     | -0.0194 | $4.54 \times 10^{-01}$ | $7.37 \times 10^{-01}$ |
| Gravidity                                       | Clostridium    | > 0     | -0.0130 | $4.61 \times 10^{-01}$ | $7.37 \times 10^{-01}$ |
| Gravidity                                       | Enterococcus   | > 0     | 0.0096  | $5.02 \times 10^{-01}$ | $7.42 \times 10^{-01}$ |
| Gravidity                                       | Lactobacillus  | > 0     | -0.0178 | $3.61 \times 10^{-01}$ | $7.26 \times 10^{-01}$ |
| Gravidity                                       | Pseudomonas    | > 0     | -0.0183 | $5.61 \times 10^{-01}$ | $7.80 \times 10^{-01}$ |
| Gravidity                                       | Staphylococcus | > 0     | 0.0066  | $8.67 \times 10^{-01}$ | $9.41 \times 10^{-01}$ |
| Gravidity                                       | Streptococcus  | > 0     | 0.0186  | $5.35 \times 10^{-01}$ | $7.61 \times 10^{-01}$ |
| Mode of delivery                                | Acinetobacter  | Vaginal | 0.0151  | $4.51 \times 10^{-01}$ | $7.37 \times 10^{-01}$ |
| Mode of delivery                                | Bacteroides    | Vaginal | -0.1064 | $5.91 \times 10^{-04}$ | $1.64 \times 10^{-02}$ |
| Mode of delivery                                | Clostridium    | Vaginal | -0.0107 | $6.09 \times 10^{-01}$ | $7.95 \times 10^{-01}$ |
| Mode of delivery                                | Enterococcus   | Vaginal | -0.0092 | $5.87 \times 10^{-01}$ | $7.89 \times 10^{-01}$ |
| Mode of delivery                                | Lactobacillus  | Vaginal | -0.0787 | $7.67 \times 10^{-04}$ | $1.64 \times 10^{-02}$ |
| Mode of delivery                                | Pseudomonas    | Vaginal | 0.1219  | $1.21 \times 10^{-03}$ | $1.94 \times 10^{-02}$ |
| Mode of delivery                                | Staphylococcus | Vaginal | 0.0379  | $4.15 \times 10^{-01}$ | $7.37 \times 10^{-01}$ |
| Mode of delivery                                | Streptococcus  | Vaginal | -0.0366 | $3.01 \times 10^{-01}$ | $6.99 \times 10^{-01}$ |
| Maternal pre-pregnancy BMI (kg/m <sup>2</sup> ) | Acinetobacter  | /       | -0.0097 | $2.46 \times 10^{-01}$ | $6.99 \times 10^{-01}$ |
| Maternal pre-pregnancy BMI (kg/m <sup>2</sup> ) | Bacteroides    | /       | -0.0110 | $3.87 \times 10^{-01}$ | $7.37 \times 10^{-01}$ |
| Maternal pre-pregnancy BMI (kg/m <sup>2</sup> ) | Clostridium    | /       | -0.0089 | $3.10 \times 10^{-01}$ | $6.99 \times 10^{-01}$ |
| Maternal pre-pregnancy BMI (kg/m <sup>2</sup> ) | Enterococcus   | /       | -0.0074 | $2.97 \times 10^{-01}$ | $6.99 \times 10^{-01}$ |
| Maternal pre-pregnancy BMI (kg/m <sup>2</sup> ) | Lactobacillus  | /       | 0.0168  | $8.09 \times 10^{-02}$ | $5.18 \times 10^{-01}$ |

|                                                 |                |              |                    |                        |                        |
|-------------------------------------------------|----------------|--------------|--------------------|------------------------|------------------------|
| Maternal pre-pregnancy BMI (kg/m <sup>2</sup> ) | Pseudomonas    | /            | 0.0290             | 6.21×10 <sup>-02</sup> | 5.13×10 <sup>-01</sup> |
| Maternal pre-pregnancy BMI (kg/m <sup>2</sup> ) | Staphylococcus | /            | -0.0104            | 5.91×10 <sup>-01</sup> | 7.89×10 <sup>-01</sup> |
| Maternal pre-pregnancy BMI (kg/m <sup>2</sup> ) | Streptococcus  | /            | 0.0213             | 1.50×10 <sup>-01</sup> | 6.24×10 <sup>-01</sup> |
| Passive smoking exposure during pregnancy       | Acinetobacter  | Yes          | 0.0007             | 9.67×10 <sup>-01</sup> | 9.81×10 <sup>-01</sup> |
| Passive smoking exposure during pregnancy       | Bacteroides    | Yes          | -0.0402            | 1.17×10 <sup>-01</sup> | 5.76×10 <sup>-01</sup> |
| Passive smoking exposure during pregnancy       | Clostridium    | Yes          | -0.0041            | 8.16×10 <sup>-01</sup> | 9.32×10 <sup>-01</sup> |
| Passive smoking exposure during pregnancy       | Enterococcus   | Yes          | 0.0205             | 1.50×10 <sup>-01</sup> | 6.24×10 <sup>-01</sup> |
| Passive smoking exposure during pregnancy       | Lactobacillus  | Yes          | -0.0351            | 7.03×10 <sup>-02</sup> | 5.13×10 <sup>-01</sup> |
| Passive smoking exposure during pregnancy       | Pseudomonas    | Yes          | -0.0497            | 1.12×10 <sup>-01</sup> | 5.76×10 <sup>-01</sup> |
| Passive smoking exposure during pregnancy       | Staphylococcus | Yes          | 0.0074             | 8.50×10 <sup>-01</sup> | 9.41×10 <sup>-01</sup> |
| Passive smoking exposure during pregnancy       | Streptococcus  | Yes          | 0.0230             | 4.38×10 <sup>-01</sup> | 7.37×10 <sup>-01</sup> |
| <b>Metadata</b>                                 | <b>Phylum</b>  | <b>Value</b> | <b>Coefficient</b> | <b>P-value</b>         | <b>Q-value</b>         |
| Conception group                                | Actinobacteria | Spontaneous  | 0.0140             | 1.36×10 <sup>-01</sup> | 4.94×10 <sup>-01</sup> |
| Conception group                                | Bacteroidetes  | Spontaneous  | 0.0830             | 6.21×10 <sup>-06</sup> | 2.49×10 <sup>-04</sup> |
| Conception group                                | Cyanobacteria  | Spontaneous  | 0.0156             | 6.79×10 <sup>-02</sup> | 3.88×10 <sup>-01</sup> |
| Conception group                                | Firmicutes     | Spontaneous  | -0.0637            | 1.14×10 <sup>-01</sup> | 4.66×10 <sup>-01</sup> |
| Conception group                                | Proteobacteria | Spontaneous  | -0.0124            | 7.67×10 <sup>-01</sup> | 9.38×10 <sup>-01</sup> |
| Maternal age (years)                            | Actinobacteria | /            | 0.0022             | 5.89×10 <sup>-01</sup> | 8.91×10 <sup>-01</sup> |
| Maternal age (years)                            | Bacteroidetes  | /            | -0.0020            | 7.95×10 <sup>-01</sup> | 9.38×10 <sup>-01</sup> |
| Maternal age (years)                            | Cyanobacteria  | /            | 0.0057             | 1.16×10 <sup>-01</sup> | 4.66×10 <sup>-01</sup> |
| Maternal age (years)                            | Firmicutes     | /            | 0.0159             | 3.54×10 <sup>-01</sup> | 7.70×10 <sup>-01</sup> |
| Maternal age (years)                            | Proteobacteria | /            | -0.0225            | 2.11×10 <sup>-01</sup> | 6.26×10 <sup>-01</sup> |
| Infant gender                                   | Actinobacteria | Male         | -0.0009            | 9.09×10 <sup>-01</sup> | 9.38×10 <sup>-01</sup> |
| Infant gender                                   | Bacteroidetes  | Male         | 0.0193             | 1.93×10 <sup>-01</sup> | 6.26×10 <sup>-01</sup> |
| Infant gender                                   | Cyanobacteria  | Male         | 0.0039             | 5.76×10 <sup>-01</sup> | 8.91×10 <sup>-01</sup> |
| Infant gender                                   | Firmicutes     | Male         | 0.0260             | 4.34×10 <sup>-01</sup> | 7.89×10 <sup>-01</sup> |
| Infant gender                                   | Proteobacteria | Male         | -0.0413            | 2.35×10 <sup>-01</sup> | 6.26×10 <sup>-01</sup> |
| Gestational age (weeks)                         | Actinobacteria | /            | -0.0030            | 4.81×10 <sup>-01</sup> | 8.36×10 <sup>-01</sup> |

|                                                 |                |         |         |                        |                        |
|-------------------------------------------------|----------------|---------|---------|------------------------|------------------------|
| Gestational age (weeks)                         | Bacteroidetes  | /       | -0.0041 | $6.15 \times 10^{-01}$ | $8.91 \times 10^{-01}$ |
| Gestational age (weeks)                         | Cyanobacteria  | /       | 0.0006  | $8.76 \times 10^{-01}$ | $9.38 \times 10^{-01}$ |
| Gestational age (weeks)                         | Firmicutes     | /       | 0.0222  | $2.28 \times 10^{-01}$ | $6.26 \times 10^{-01}$ |
| Gestational age (weeks)                         | Proteobacteria | /       | -0.0174 | $3.66 \times 10^{-01}$ | $7.70 \times 10^{-01}$ |
| Gravidity                                       | Actinobacteria | > 0     | -0.0064 | $4.25 \times 10^{-01}$ | $7.89 \times 10^{-01}$ |
| Gravidity                                       | Bacteroidetes  | > 0     | -0.0036 | $8.13 \times 10^{-01}$ | $9.38 \times 10^{-01}$ |
| Gravidity                                       | Cyanobacteria  | > 0     | -0.0016 | $8.22 \times 10^{-01}$ | $9.38 \times 10^{-01}$ |
| Gravidity                                       | Firmicutes     | > 0     | -0.0114 | $7.40 \times 10^{-01}$ | $9.38 \times 10^{-01}$ |
| Gravidity                                       | Proteobacteria | > 0     | 0.0132  | $7.12 \times 10^{-01}$ | $9.38 \times 10^{-01}$ |
| Mode of delivery                                | Actinobacteria | Vaginal | -0.0015 | $8.71 \times 10^{-01}$ | $9.38 \times 10^{-01}$ |
| Mode of delivery                                | Bacteroidetes  | Vaginal | -0.0710 | $1.15 \times 10^{-04}$ | $2.29 \times 10^{-03}$ |
| Mode of delivery                                | Cyanobacteria  | Vaginal | -0.0246 | $4.69 \times 10^{-03}$ | $4.69 \times 10^{-02}$ |
| Mode of delivery                                | Firmicutes     | Vaginal | -0.0687 | $9.12 \times 10^{-02}$ | $4.56 \times 10^{-01}$ |
| Mode of delivery                                | Proteobacteria | Vaginal | 0.1238  | $3.84 \times 10^{-03}$ | $4.69 \times 10^{-02}$ |
| Maternal pre-pregnancy BMI (kg/m <sup>2</sup> ) | Actinobacteria | /       | 0.0019  | $6.24 \times 10^{-01}$ | $8.91 \times 10^{-01}$ |
| Maternal pre-pregnancy BMI (kg/m <sup>2</sup> ) | Bacteroidetes  | /       | -0.0002 | $9.76 \times 10^{-01}$ | $9.76 \times 10^{-01}$ |
| Maternal pre-pregnancy BMI (kg/m <sup>2</sup> ) | Cyanobacteria  | /       | 0.0011  | $7.67 \times 10^{-01}$ | $9.38 \times 10^{-01}$ |
| Maternal pre-pregnancy BMI (kg/m <sup>2</sup> ) | Firmicutes     | /       | -0.0190 | $2.61 \times 10^{-01}$ | $6.29 \times 10^{-01}$ |
| Maternal pre-pregnancy BMI (kg/m <sup>2</sup> ) | Proteobacteria | /       | 0.0196  | $2.67 \times 10^{-01}$ | $6.29 \times 10^{-01}$ |
| Passive smoking exposure during pregnancy       | Actinobacteria | Yes     | -0.0069 | $3.85 \times 10^{-01}$ | $7.70 \times 10^{-01}$ |
| Passive smoking exposure during pregnancy       | Bacteroidetes  | Yes     | -0.0300 | $4.92 \times 10^{-02}$ | $3.28 \times 10^{-01}$ |
| Passive smoking exposure during pregnancy       | Cyanobacteria  | Yes     | -0.0161 | $2.67 \times 10^{-02}$ | $2.14 \times 10^{-01}$ |
| Passive smoking exposure during pregnancy       | Firmicutes     | Yes     | 0.0036  | $9.15 \times 10^{-01}$ | $9.38 \times 10^{-01}$ |
| Passive smoking exposure during pregnancy       | Proteobacteria | Yes     | 0.0236  | $5.06 \times 10^{-01}$ | $8.44 \times 10^{-01}$ |

Supplementary Table 2. Linear association analysis of infant first-pass meconium microbiota  $\alpha$ -diversity with early-life factors

| Factor                                 | Diversity (Simpson index) in all meconium <sup>a</sup> |                        | Diversity (Simpson index) in ART meconium <sup>a</sup> |                        | Diversity (Simpson index) in Spontaneous meconium <sup>a</sup> |                        |
|----------------------------------------|--------------------------------------------------------|------------------------|--------------------------------------------------------|------------------------|----------------------------------------------------------------|------------------------|
|                                        | $\beta$ (95% CI)                                       | <i>P</i> value         | $\beta$ (95% CI)                                       | <i>P</i> value         | $\beta$ (95% CI)                                               | <i>P</i> value         |
| Conception group                       |                                                        |                        |                                                        |                        |                                                                |                        |
| ART                                    | Ref.                                                   |                        |                                                        |                        |                                                                |                        |
| Spontaneous                            | 0.12(0.03,0.21)                                        | $9.02 \times 10^{-03}$ |                                                        |                        |                                                                |                        |
| Maternal Age                           | -0.004(-0.01,0.01)                                     | $4.14 \times 10^{-01}$ | -0.01(-0.03,0.0001)                                    | $5.43 \times 10^{-02}$ | 0.005(-0.01,0.02)                                              | $4.53 \times 10^{-01}$ |
| Pre-pregnancy BMI (kg/m <sup>2</sup> ) | 0.01(-0.01,0.02)                                       | $3.66 \times 10^{-01}$ | -0.01(-0.03,0.01)                                      | $3.63 \times 10^{-01}$ | 0.01(-0.002,0.02)                                              | $9.36 \times 10^{-02}$ |
| Gravidity                              |                                                        |                        |                                                        |                        |                                                                |                        |
| 0                                      | Ref.                                                   |                        | Ref.                                                   |                        | Ref.                                                           |                        |
| > 0                                    | -0.02(-0.10,0.06)                                      | $6.55 \times 10^{-01}$ | -0.05(-0.15,0.06)                                      | $4.03 \times 10^{-01}$ | 0.004(-0.11,0.12)                                              | $9.42 \times 10^{-01}$ |
| Gestational age (weeks)                | 0.02(-0.003,0.05)                                      | $8.30 \times 10^{-02}$ | 0.01(-0.03,0.04)                                       | $6.32 \times 10^{-01}$ | 0.02(-0.04,0.08)                                               | $4.61 \times 10^{-01}$ |
| Mode of Delivery                       |                                                        |                        |                                                        |                        |                                                                |                        |
| C/S                                    | Ref.                                                   |                        | Ref.                                                   |                        | Ref.                                                           |                        |
| Vaginal                                | -0.08(-0.16,0.01)                                      | $7.43 \times 10^{-02}$ | -0.04(-0.19,0.11)                                      | $6.29 \times 10^{-01}$ | -0.17(-0.28,-0.06)                                             | $2.64 \times 10^{-03}$ |
| Infant Gender                          |                                                        |                        |                                                        |                        |                                                                |                        |
| Male                                   | Ref.                                                   |                        | Ref.                                                   |                        | Ref.                                                           |                        |
| Female                                 | 0.02(-0.05,0.10)                                       | $5.52 \times 10^{-01}$ | 0.05(-0.05,0.16)                                       | $3.40 \times 10^{-01}$ | -0.01(-0.12,0.09)                                              | $8.15 \times 10^{-01}$ |

<sup>a</sup>Adjusted for gestational age, **mode of delivery** and infant gender



Supplementary Table 3. Tobit regression analysis of infant first-pass meconium microbiota Bacteroidetes relative abundance with early-life factors

| Factor                                 | Bacteroidetes abundance in all meconium <sup>a</sup> |                        | Bacteroidetes abundance in ART meconium <sup>a</sup> |                        | Bacteroidetes abundance in Spontaneous meconium <sup>a</sup> |                        |
|----------------------------------------|------------------------------------------------------|------------------------|------------------------------------------------------|------------------------|--------------------------------------------------------------|------------------------|
|                                        | $\beta$ (95% CI)                                     | <i>P</i> value         | $\beta$ (95% CI)                                     | <i>P</i> value         | $\beta$ (95% CI)                                             | <i>P</i> value         |
| Conception group                       |                                                      |                        |                                                      |                        |                                                              |                        |
| ART                                    | Ref.                                                 |                        |                                                      |                        |                                                              |                        |
| Spontaneous                            | 0.11(0.05,0.18)                                      | $4.02 \times 10^{-04}$ |                                                      |                        |                                                              |                        |
| Maternal Age                           | 0.003(-0.004,0.01)                                   | $4.73 \times 10^{-01}$ | 0.002(-0.005,0.01)                                   | $5.36 \times 10^{-01}$ | 0.001(-0.01,0.01)                                            | $8.18 \times 10^{-01}$ |
| Pre-pregnancy BMI (kg/m <sup>2</sup> ) | 0.002(-0.01,0.01)                                    | $5.70 \times 10^{-01}$ | 0.001(-0.01,0.01)                                    | $8.39 \times 10^{-01}$ | 0.001(-0.01,0.01)                                            | $8.24 \times 10^{-01}$ |
| Gravidity                              |                                                      |                        |                                                      |                        |                                                              |                        |
| 0                                      | Ref.                                                 |                        | Ref.                                                 |                        | Ref.                                                         |                        |
| > 0                                    | 0.01(-0.05,0.06)                                     | $8.33 \times 10^{-01}$ | -0.05(-0.11,-0.002)                                  | $4.11 \times 10^{-02}$ | 0.09(-0.01,0.19)                                             | $9.02 \times 10^{-02}$ |
| Gestational age (weeks)                | 0.01(-0.01,0.03)                                     | $3.49 \times 10^{-01}$ | -0.01(-0.02,0.01)                                    | $4.84 \times 10^{-01}$ | 0.01(-0.04,0.07)                                             | $6.85 \times 10^{-01}$ |
| Mode of Delivery                       |                                                      |                        |                                                      |                        |                                                              |                        |
| C/S                                    | Ref.                                                 |                        | Ref.                                                 |                        | Ref.                                                         |                        |
| Vaginal                                | -0.07(-0.13,-0.01)                                   | $2.16 \times 10^{-02}$ | -0.02(-0.09,0.06)                                    | $6.71 \times 10^{-01}$ | -0.18(-0.28,-0.08)                                           | $3.99 \times 10^{-04}$ |
| Infant Gender                          |                                                      |                        |                                                      |                        |                                                              |                        |
| Male                                   | Ref.                                                 |                        | Ref.                                                 |                        | Ref.                                                         |                        |
| Female                                 | -0.02(-0.08,0.03)                                    | $3.86 \times 10^{-01}$ | -0.002(-0.05,0.05)                                   | $9.45 \times 10^{-01}$ | -0.04(-0.14,0.05)                                            | $3.76 \times 10^{-01}$ |

<sup>a</sup>Adjusted for gestational age, **mode of delivery** and infant gender
